# Supplementary material for: Roles of Proteins Containing Immunoglobulin-Like Domains in the Conjugation of Bacterial Plasmids
Source: PubMed Central journal article supplement (PMC8730810; doi:10.1128/msphere.00978-21), 2022-01-05
Supplement: msphere.00978-21-sf001.pdf [file msphere.00978-21-sf001.pdf]

pAPEC1990 LLGVDYNYSDIGWSSFYRYWVNNVSLP----VTVSSIRVKVEPRPYVQTAVHRG--SC-- 434  
pNDM-KN LLGVDYNYSDIGWSSFYRYWVNNVSLP----VTVSSIRVKVEPRPYVQTAVHRG--SC-- 434  
pUMNK88 LLGVDYNYSDIGWSSFYRYWVNNVSLP----VTVSSIRVKVEPRPYVQTAVHRG--SC-- 434  
pCf587 LLGVDYNYSDIGWSSMYRYWVDSSVLP----VTVSSIRVKVEPRPYVQTAVHRG--SC-- 434  
\*:\* . \* \*\* ... : ..\*:\*\*\*\*\*.\* :

pKAZ3 PANASYAEVDTDISFSGRSCSWPGYWSRPEGKPELPSDR-----IGAT--F 487  
pMS6198A -----EIPVGQDSCVIANSFTMAKGTGTVHDNATVFNPDKSLRSNPLWAEVNW 483  
pKp55 -----EIPVGQDSCVIANSFTMAKGTGTVHDNATVFNPDKSLRSNPLWAEVNW 487  
pEc19 -----EIPVGQDSCVIANSFTMAKGTGTVHDNATVFNPDKSLRSNPLWAEVNW 487  
pAPEC1990 -----EIPVGQDSCVIANSFTMAKGTGTVHDNATVFNPDKSLRSNPLWAEVNW 483  
pNDM-KN -----EIPVGQDSCVIANSFTMAKGTGTVHDNATVFNPDKSLRSNPLWAEVNW 483  
pUMNK88 -----EIPVGQDSCVIANSFTMAKGTGTVHDNATVFNPDKSLRSNPLWAEVNW 483  
pCf587 -----EIPVGQDSCVIANSFTMSKGTGTVHDNATVFNADRSLSNPLWAEVNW 483  
:: .. \*\* . :: :\*. \* . : \* :

pKAZ3 CYDLNPPEIAGLERNGRIFKAHFREPDSD---FDGWGV-NQWVISNNSASAITSTGEERP 543  
pMS6198A NDQHYPLQLSQQFDQNSKVFRLFVNQFGRGAYFDRRLRLRSAWIEDSKG--NKLS----- 534  
pKp55 NDQHYPLQLSQQFDQNSKVFRLFVNQFGRGAYFDRRLRLRSAWIEDSKG--NKLS----- 538  
pEc19 NDQHYPLQLSQQFDQNSKVFRLFVNQFGRGAYFDRRLRLRSAWIEDSKG--NKLS----- 538  
pAPEC1990 NDQHYPLQLSQQFDQNSKVFRLFVNQFGRGAYFDRRLRLRSAWIEDSKG--NKLS----- 534  
pNDM-KN NDQHYPLQLSQQFDQNSKVFRLFVNQFGRGAYFDRRLRLRSAWIEDSKG--NKLS----- 534  
pUMNK88 NDQHYPLQLSQQFDQNSKVFRLFVNQFGRGAYFDRRLRLRSAWIEDSKG--NKLS----- 534  
pCf587 NDQHYPLQLSQQFDQNSKVFRLFVNQFGRGAYFDRRLRLRSAWIEDSKG--NKLS----- 534  
: \* : .....\* . ....\* \*\* : . \*: ..... : :

pKAZ3 LSRTEVLRSTNDWFFTFSAENLSEGTYTGISLVAKDAFGNEVKQVFTGSQYAMSIDNSA 603  
pMS6198A -PTGGLIANNWENYTYQWDLKTLPEGQYSLVAAA-EEMHG----PLTRQPMFQITSDRTP 588  
pKp55 -PTGGLIANNWENYTYQWDLKTLPEGQYSLVAAA-EEMHG----PLTRQPMFQITSDRTP 592  
pEc19 -PTGGLIANNWENYTYQWDLKTLPEGQYSLVAAA-EEMHG----PLTRQPMFQITSDRTP 592  
pAPEC1990 -PTGGLIANNWENYTYQWDLKTLPEGQYSLVAAA-EEMHG----PLTRQPMFQITSDRTP 588  
pNDM-KN -PTGGLIANNWENYTYQWDLKTLPEGQYSLVAAA-EEMHG----PLTRQPMFQITSDRTP 588  
pUMNK88 -PTGGLIANNWENYTYQWDLKTLPEGQYSLVAAA-EEMHG----PLTRQPMFQITSDRTP 588  
pCf587 -PTGGLIANNWENYTYQWDLKTLPEGQYSLVAAA-EEMHG----PLTRQPMFQITSDKTA 588  
:: .. : : : : : \* \* \* : : . : : . \* : : : \* :

pKAZ3 PTLTVSISDGAPIQLDDVVIITLTDADPSFKLTSIALVGGPADDKVQLSWREESKGRFR 663  
pMS6198A PTMTLSVADGAAIQTLDVVITLADAIIDPSFKLTSIALVGGPANDKVQLSWREESKGRFR 648  
pKp55 PTMTLSVADGAAIQTLDVVITLADAIIDPSFKLTSIALVGGPANDKVQLSWREESKGRFR 652  
pEc19 PTMTLSVADGAAIQTLDVVITLADAIIDPSFKLTSIALVGGPANDKVQLSWREESKGRFR 652  
pAPEC1990 PTMTLSVADGAAIQTLDVVITLADAIIDPSFKLTSIALVGGPANDKVQLSWREESKGRFR 648  
pNDM-KN PTMTLSVADGAAIQTLDVVITLADAIIDPSFKLTSIALVGGPANDKVQLSWREESKGRFR 648  
pUMNK88 PTMTLSVADGAAIQTLDVVITLADAIIDPSFKLTSIALVGGPANDKVQLSWREESKGRFR 648  
pCf587 PTLTVSISDGAPIQLDDVVIITLTDADPSFKLTSIALVGGPANDKVQLSWREESKGRFR 648  
\*\*:\*:\*:\*:\*:\*:\*:\*:\*:\*:\*:\*:\*:\*:\*:\*:\*:\*:\*:\*:\*:\*:\*:\*:\*:\*:\*:\*:\*:\*:\*:\*:\*:\*:\*:\*:\*:\*:\*:\*:\*\*:

pKAZ3 LEYPVMFPSLKEGESYTLTVSGEDAQGNVQKAVGFYKPRQVMLADGMDGKVMVPAVTH 723  
pMS6198A LEYPVMFPSLKEGESYTLTVSGEDAQGNVQKAVGFYKPRQVMLADGMDGKVMVPAVTH 708  
pKp55 LEYPVMFPSLKEGESYTLTVSGEDAQGNVQKAVGFYKPRQVMLADGMDGKVMVPAVTH 712  
pEc19 LEYPVMFPSLKEGESYTLTVSGEDAQGNVQKAVGFYKPRQVMLADGMDGKVMVPAVTH 712  
pAPEC1990 LEYPVMFPSLKEGESYTLTVSGEDAQGNVQKAVGFYKPRQVMLADGMDGKVMVPAVTH 708  
pNDM-KN LEYPVMFPSLKEGESYTLTVSGEDAQGNVQKAVGFYKPRQVMLADGMDGKVMVPAVTH 708  
pUMNK88 LEYPVMFPSLKEGESYTLTVSGEDAQGNVQKAVGFYKPRQVMLADGMDGKVMVPAVTH 708  
pCf587 LEYPVMFPSLKEGESYTLTVSGEDAQGNVQKAVGFYKPRQVMLADGMDGKVMVPAVTH 708  
\*\*\*\*\*:\*:\*:\*:\*:\*:\*:\*:\*:\*:\*:\*:\*:\*:\*:\*:\*:\*:\*:\*:\*:\*\*:

pKAZ3 EFVHADGKRI IETKPLTSLDGAVVTVGSYDFATLRSDAKVPLVNVGVRIEPGQTMGIMSQ 783  
pMS6198A EFVHADGKRI IETKPLTSLDGAVVTVGSYDFATLRSDAKVPLVNVGVRIEPGQTMGIMSQ 768  
pKp55 EFVHADGKRI IETKPLTSLDGAVVTVGSYDFATLRSDAKVPLVNVGVRIEPGQTMGIMSQ 772  
pEc19 EFVHADGKRI IETKPLTSLDGAVVTVGSYDFATLRSDAKVPLVNVGVRIEPGQTMGIMSQ 772  
pAPEC1990 EFVHADGKRI IETKPLTSLDGAVVTVGSYDFATLRSDAKVPLVNVGVRIEPGQTMGIMSQ 768  
pNDM-KN EFVHADGKRI IETKPLTSLDGAVVTVGSYDFATLRSDAKVPLVNVGVRIEPGQTMGIMSQ 768  
pUMNK88 EFVHADGKRI IETKPLTSLDGAVVTVGSYDFATLRSDAKVPLVNVGVRIEPGQTMGIMSQ 768  
pCf587 EFVHADGKRI IETKPLTSLDGAIVTVGSYDFATLRSDAKVPLVNVGVRIEPGQTMGIMSQ 768  
\*\*\*\*\*:\*:\*:\*:\*:\*:\*:\*:\*:\*:\*:\*:\*:\*:\*:\*\*:

pKAZ3 HDFGASGGRLSIPVKPAVPDVGSSLLVMTSAPNSPILVVDINTWKGTAKLSAESWTIR 843  
pMS6198A HDFGASGGRLSIPVKPAVPDVGSSLLVMTSAPNSPILVVDINTWKGTAKLSAESWTIR 828  
pKp55 HDFGASGGRLSIPVKPAVPDVGSSLLVMTSAPNSPILVVDINTWKGTAKLSAESWTIR 832  
pEc19 HDFGASGGRLSIPVKPAVPDVGSSLLVMTSAPNSPILVVDINTWKGTAKLSAESWTIR 832  
pAPEC1990 HDFGASGGRLSIPVKPAVPDVGSSLLVMTSAPNSPILVVDINTWKGTAKLSAESWTIR 828  
pNDM-KN HDFGASGGRLSIPVKPAVPDVGSSLLVMTSAPNSPILVVDINTWKGTAKLSAESWTIR 828  
pUMNK88 HDFGASGGRLSIPVKPAVPDVGSSLLVMTSAPNSPILVVDINTWKGTAKLSAESWTIR 828  
pCf587 HDFGASGGRLSIPVKPAIPDVGSSLLVMTSAPNSPILVVDINTWKGAAKLSAESWTIR 828  
\*\*\*\*\*:\*:\*:\*:\*:\*:\*:\*:\*:\*:\*:\*:\*:\*:\*\*:

pKAZ3 QVIDPVKIYALPESGVPCRFTTKEDVAMAADPIRDPVCLLQWDRTPDEAEQTTQDNNGMK 903

|           |                                                                                                                               |      |
|-----------|-------------------------------------------------------------------------------------------------------------------------------|------|
| pMS6198A  | QVIDPVKIYALPESGVPCRFTTKEDVAMAADPIRDPVCLLQWDRTPDEAEQTTQDNNGMK                                                                  | 888  |
| pKp55     | QVIDPVKIYALPESGVPCRFTTKEDVAMAADPIRDPVCLLQWDRTPDEAEQTTQDNNGMK                                                                  | 892  |
| pEc19     | QVIDPVKIYALPESGVPCRFTTKEDVAMAADPIRDPVCLLQWDRTPDEAEQTTQDNNGMK                                                                  | 892  |
| pAPEC1990 | QVIDPVKIYALPESGVPCRFTTKEDVAMAADPIRDPVCLLQWDRTPDEAEQTTQDNNGMK                                                                  | 888  |
| pNDM-KN   | QVIDPVKIYALPESGVPCRFTTKEDVAMAADPIRDPVCLLQWDRTPDEAEQTTQDNNGMK                                                                  | 888  |
| pUMNK88   | QVIDPVKIYALPESGVPCRFTTKEDVAMAADPIRDPVCLLQWDRTPDEAEQTTQDNNGMK                                                                  | 888  |
| pCf587    | QVIDPVKIYALPETGVPCRFTTKADVAMAADPIRDPVCLLQWDRTPDEAEQTTQDNTNGMK<br>*****:***** *****:*****:*****:*****:*****:*****:*****        | 888  |
| pKAZ3     | VAGLVGQAVSIGEQPVEYSLYLFSGDGSKVKVSGSQNLTVTTAYGSVGYTPIDDDIAQVN                                                                  | 963  |
| pMS6198A  | VAGLVGQAVSIGEQPVEYSLYLFSGDGSKVKVSGSQNLTVTTAYGSVGYTPIDDDIAQVN                                                                  | 948  |
| pKp55     | VAGLVGQAVSIGEQPVEYSLYLFSGDGSKVKVSGSQNLTVTTAYGSVGYTPIDDDIAQVN                                                                  | 952  |
| pEc19     | VAGLVGQAVSIGEQPVEYSLYLFSGDGSKVKVSGSQNLTVTTAYGSVGYTPIDDDIAQVN                                                                  | 952  |
| pAPEC1990 | VAGLVGQAVSIGEQPVEYSLYLFSGDGSKVKVSGSQNLTVTTAYGSVGYTPIDDDIAQVN                                                                  | 948  |
| pNDM-KN   | VAGLVGQAVSIGEQPVEYSLYLFSGDGSKVKVSGSQNLTVTTAYGSVGYTPIDDDIAQVN                                                                  | 948  |
| pUMNK88   | VAGLVGQAVSIGEQPVEYSLYLFSGDGSKVKVSGSQNLTVTTAYGSVGYTPIDDDIAQVN                                                                  | 948  |
| pCf587    | VAGLVGQAVSIGEQPVEYSLYLFSGDGSKVKVSGSQNLTVTTAYGSVGYTPIDDDIAQVN<br>*****:*****:*****:*****:*****:*****:*****                     | 948  |
| pKAZ3     | RVIEDFDVNFQKSGPDCSITLSADRAKKEAANKAVGSASRACLFEWQQIPDGLVQDPLS                                                                   | 1023 |
| pMS6198A  | RVIEDFDVNFQKSGPDCSITLSADRAKKEAANKAVGSASRACLFEWQQIPDGLVQDPLS                                                                   | 1008 |
| pKp55     | RVIEDFDVNFQKSGPDCSITLSADRAKKEAANKAVGSASRACLFEWQQIPDGLVQDPLS                                                                   | 1012 |
| pEc19     | RVIEDFDVNFQKSGPDCSITLSADRAKKEAANKAVGSASRACLFEWQQIPDGLVQDPLS                                                                   | 1012 |
| pAPEC1990 | RVIEDFDVNFQKSGPDCSITLSADRAKKEAANKAVGSASRACLFEWQQIPDGLVQDPLS                                                                   | 1008 |
| pNDM-KN   | RVIEDFDVNFQKSGPDCSITLSADRAKKEAANKAVGSASRACLFEWQQIPDGLVQDPLS                                                                   | 1008 |
| pUMNK88   | RVIEDFDVNFQKSGPDCSITLSADRAKKEAANKAVGSASRACLFEWQQIPDGLVQDPLS                                                                   | 1008 |
| pCf587    | RVIEFNFNVLKQNKGPDCSITLSADRAKKEAASKGAGSASRACLFEWQQIPDGLLQEQLS<br>***:*.***:***:*****:***:*.*****:*****:***:***:*****:***:***   | 1008 |
| pKAZ3     | ESPSLSGSLAENGDPVHPLGWRVSIIFTRNGTRVTLNDETFNVEAVDPPAPTVELASDYNFKD                                                               | 1083 |
| pMS6198A  | ESPSLSGSLASNGVHPLGWRVSIIFTRNGTRVTLNDETFNVEAVDPPAPTVELASDYNFKD                                                                 | 1068 |
| pKp55     | ESPSLSGSLASNGVHPLGWRVSIIFTRNGTRVTLNDETFNVEAVDPPAPTVELASDYNFKD                                                                 | 1072 |
| pEc19     | ESPSLSGSLASNGVHPLGWRVSIIFTRNGTRVTLNDETFNVEAVDPPAPTVELASDYNFKD                                                                 | 1072 |
| pAPEC1990 | ESPSLSGSLASNGVHPLGWRVSIIFTRNGTRVTLNDETFNVEAVDPPAPTVELASDYNFKD                                                                 | 1068 |
| pNDM-KN   | ESPSLSGSLASNGVHPLGWRVSIIFTRNGTRVTLNDETFNVEAVDPPAPTVELASDYNFKD                                                                 | 1068 |
| pUMNK88   | ESPSLSGSLASNGVHPLGWRVSIIFTRNGTRVTLNDETFNVEAVDPPAPTVELASDYNFKD                                                                 | 1068 |
| pCf587    | ESPSLSGSLASNGVHPLGWRVSIIFTRNGTRVTLNDETFNVEAVDPPAPTVELSSKFNFKD<br>*****:*.*****:*****:***:*****:***:***:*****:***:***          | 1068 |
| pKAZ3     | NIYLVPMGTGNYLGDIAINSERADLDIAISRNSDVLESETFPPGWGATNKVYRRINTDERA                                                                 | 1143 |
| pMS6198A  | NIYLVPMGTGNYLGDIAINSERADLDIAISRNSDVLESETFPPGWGATNKVYRRINTDERA                                                                 | 1128 |
| pKp55     | NIYLVPMGTGNYLGDIAINSERADLDIAISRNSDVLESETFPPGWGATNKVYRRINTDERA                                                                 | 1132 |
| pEc19     | NIYLVPMGTGNYLGDIAINSERADLDIAISRNSDVLESETFPPGWGATNKVYRRINTDERA                                                                 | 1132 |
| pAPEC1990 | NIYLVPMGTGNYLGDIAINSERADLDIAISRNSDVLESETFPPGWGATNKVYRRINTDERA                                                                 | 1128 |
| pNDM-KN   | NIYLVPMGTGNYLGDIAINSERADLDIAISRNSDVLESETFPPGWGATNKVYRRINTDERA                                                                 | 1128 |
| pUMNK88   | NIYLVPMGTGNYLGDIAINSERADLDIAISRNSDVLESETFPPGWGATNKVYRRINTDERA                                                                 | 1128 |
| pCf587    | NIYVPMGTGNYLGDIAISSERADLDIAISRNSGVLESETFAPGWGATNKVYRRINTDERA<br>***:*****:*****:*****:*****:*****:*****:*****:*****:*****     | 1128 |
| pKAZ3     | LWEETTYKVNAAYNKVPDVKTEVVYRAISAPSDSIRPIVEVKGDTAIDTQALPVRVLIRD                                                                  | 1203 |
| pMS6198A  | LWEETTYKVNAAYNKVPDVKTEVVYRAISAPSDSIRPIVEVKGDTAIDTQALPVRVLIRD                                                                  | 1188 |
| pKp55     | LWEETTYKVNAAYNKVPDVKTEVVYRAISAPSDSIRPIVEVKGDTAIDTQALPVRVLIRD                                                                  | 1192 |
| pEc19     | LWEETTYKVNAAYNKVPDVKTEVVYRAISAPSDSIRPIVEVKGDTAIDTQALPVRVLIRD                                                                  | 1192 |
| pAPEC1990 | LWEETTYKVNAAYNKVPDVKTEVVYRAISAPSDSIRPIVEVKGDTAIDTQALPVRVLIRD                                                                  | 1188 |
| pNDM-KN   | LWEETTYKVNAAYNKVPDVKTEVVYRAISAPSDSIRPIVEVKGDTAIDTQALPVRVLIRD                                                                  | 1188 |
| pUMNK88   | LWEETTYKVNAAYNKVPDVKTEVVYRAISAPSDSIRPIVEVKGDTAIDTQALPVRVLIRD                                                                  | 1188 |
| pCf587    | LWEETTYKVNAAYNKVPDVKTEAIVYRAIAAPSDSIRPVVEVDGDNAIDTQALPVRVLIRD<br>*****:*****:*****:***:***:*****:*****:*****:*****:*****      | 1188 |
| pKAZ3     | QYKPDGDYDANTMGVWVKVRLIQQKAYNETVALTDYAEASNGEAQFSVDLSGVDTSVSVRIA                                                                | 1263 |
| pMS6198A  | QYKPDGDYDANTMGVWVKVRLIQQKAYNETVALTDYAEASNGEAQFSVDLSGVDTSVSVRIA                                                                | 1248 |
| pKp55     | QYKPDGDYDANTMGVWVKVRLIQQKAYNETVALTDYAEASNGEAQFSVDLSGVDTSVSVRIA                                                                | 1252 |
| pEc19     | QYKPDGDYDANTMGVWVKVRLIQQKAYNETVALTDYAEASNGEAQFSVDLSGVDTSVSVRIA                                                                | 1252 |
| pAPEC1990 | QYKPDGDYDANTMGVWVKVRLIQQKAYNETVALTDYAEASNGEAQFSVDLSGVDTSVSVRIA                                                                | 1248 |
| pNDM-KN   | QYKPDGDYDANTMGVWVKVRLIQQKAYNETVALTDYAEASNGEAQFSVDLSGVDTSVSVRIA                                                                | 1248 |
| pUMNK88   | QYKPDGDYDANTMGVWVKVRLIQQKAYNETVALTDYAEASNGEAQFSVDLSGVDTSVSVRIA                                                                | 1248 |
| pCf587    | QYKPDGGYDANTMGVWVKVRLIQQKAYNETVALTDYAEASNGEAQFSVDLSGVDTSVSVRIA<br>*****:*****:*****:*****:*****:*****:*****:*****:*****:***** | 1248 |
| pKAZ3     | AEAVLESPEVEGYNRTELSIRPAFLTVLRGGAIGAGVEARKLSGEAPFTAVFKLSLDDRQD                                                                 | 1323 |
| pMS6198A  | AEAVLESPEVEGYNRTELSIRPAFLTVLRGGAIGAGVEARKLSGEAPFTAVFKLSLDDRQD                                                                 | 1308 |
| pKp55     | AEAVLESPEVEGYNRTELSIRPAFLTVLRGGAIGAGVEARKLSGEAPFTAVFKLSLDDRQD                                                                 | 1312 |
| pEc19     | AEAVLESPEVEGYNRTELSIRPAFLTVLRGGAIGAGVEARKLSGEAPFTAVFKLSLDDRQD                                                                 | 1312 |
| pAPEC1990 | AEAVLESPEVEGYNRTELSIRPAFLTVLRGGAIGAGVEARKLSGEAPFTAVFKLSLDDRQD                                                                 | 1308 |
| pNDM-KN   | AEAVLESPEVEGYNRTELSIRPAFLTVLRGGAIGAGVEARKLSGEAPFTAVFKLSLDDRQD                                                                 | 1308 |
| pUMNK88   | AEAVLESPEVEGYNRTELSIRPAFLTVLRGGAIGAGVEARKLSGEAPFTAVFKLSLDDRQD                                                                 | 1308 |
| pCf587    | AEAVLDSPEVEGYNRTELSIRPAFLTVLRGGAIAAGVEARKLSGEAPFTAVFKLALDNRQD                                                                 | 1308 |

```

*****:*****.*****:***:***
pKAZ3          LRATGQVVWETS KDDGKTWEQFI PEDRYKYQLVKTFDKGEYQVRAKVVVNVNSGAEKYTEA 1383
pMS6198A      LRATGQVVWETS KDDGKTWEQFI PEDRYKYQLVKTFDKGEYQVRAKVVVNVNSGAEKYTEA 1368
pKp55         LRATGQVVWETS KDDGKTWEQFI PEDRYKYQLVKTFDKGEYQVRAKVVVNVNSGAEKYTEA 1372
pEc19         LRATGQVVWETS KDDGKTWEQFI PEDRYKYQLVKTFDKGEYQVRAKVVVNVNSGAEKYTEA 1372
pAPEC1990     LRATGQVVWETS KDDGKTWEQFI PEDRYKYQLVKTFDKGEYQVRAKVVVNVNSGAEKYTEA 1368
pNDM-KN       LRATGQVVWETS KDDGKTWEQFI PEDRYKYQLVKTFDKGEYQVRAKVVVNVNSGAEKYTEA 1368
pUMNK88       LRATGQVVWETS KDDGKTWEQFI PEDRYKYQLVKTFDKGEYQVRAKVVVNVNSGAEKYTEA 1368
pCf587        LRATGQVVWETS KDDGKTWEQFI PEERYKYQLVKTFDKGEYQVRAKVVVNVNSGAEKYTEA 1368
*****:*****.*****:*****

pKAZ3          VSVVAYDKPDI AVIGPTTLFVVGSEKGYTANLTLNDEPISGGNAIVEWSTDGGKTYAQTGD 1443
pMS6198A      VSVVAYDKPDI AVIGPTTLFVVGSEKGYTANLTLNDEPISGGNAIVEWSTDGGKTYAQTGD 1428
pKp55         VSVVAYDKPDI AVIGPTTLFVVGSEKGYTANLTLNDEPISGGNAIVEWSTDGGKTYAQTGD 1432
pEc19         VSVVAYDKPDI AVIGPTTLFVVGSEKGYTANLTLNDEPISGGNAIVEWSTDGGKTYAQTGD 1432
pAPEC1990     VSVVAYDKPDI AVIGPTTLFVVGSEKGYTANLTLNDEPISGGNAIVEWSTDGGKTYAQTGD 1428
pNDM-KN       VSVVAYDKPDI AVIGPTTLFVVGSEKGYTANLTLNDEPISGGNAIVEWSTDGGKTYAQTGD 1428
pUMNK88       VSVVAYDKPDI AVIGPTTLFVVGSEKGYTANLTLNDEPISGGNAIVEWSTDGGKTYAQTGD 1428
pCf587        VSVVAYDKPDI AVVGPPTTLFVVGSEKGYTASLALNDEPITDGNVAVWSTDGGKTYSHKGN 1428
*****:*****.*****:*****:*****:*****:*****:*****:*****:*****

pKAZ3          SITLSSDEETRYRLWARVRSATAPADDGYAYEVAKTAVDFRAVKAPRPYVTGPRVIETGK 1503
pMS6198A      SITLSSDEETRYRLWARVRSATAPADDGYAYEVAKTAVDFRAVKAPRPYVTGPRVIETGK 1488
pKp55         SITLSSDEETRYRLWARVRSATAPADDGYAYEVAKTAVDFRAVKAPRPYVTGPRVIETGK 1492
pEc19         SITLSSDEETRYRLWARVRSATAPADDGYAYEVAKTAVDFRAVKAPRPYVTGPRVIETGK 1492
pAPEC1990     SITLSSDEETRYRLWARVRSATAPADDGYAYEVAKTAVDFRAVKAPRPYVTGPRVIETGK 1488
pNDM-KN       SITLSSDEETRYRLWARVRSATAPADDGYAYEVAKTAVDFRAVKAPRPYVTGPRVIETGK 1488
pUMNK88       SITLSSDEETRYRLWARVRSATAPADDGYAYEVAKTAVDFRAVKAPRPYVTGPRVIETGK 1488
pCf587        SITLSSDEETRYRLWARVRSANAPADDYAYDVAKTAVDFRAVKAPRPYVVGPOVLETGK 1488
*****:*****.*****:*****:*****:*****:*****:*****:*****:*****

pKAZ3          KYVFKAETS LPYRGMDVKLNGFFTLPDGSI VQGD TAEYVPSDTDLNQATVETKYTTWIEG 1563
pMS6198A      KYVFKAETS LPYRGMDVKLNGFFTLPDGSI VQGD TAEYVPSDTDLNQATVETKYTTWIEG 1548
pKp55         KYVFKAETS LPYRGMDVKLNGFFTLPDGSI VQGD TAEYVPSDTDLNQATVETKYTTWIEG 1552
pEc19         KYVFKAETS LPYRGMDVKLNGFFTLPDGSI VQGD TAEYVPSDTDLNQATVETKYTTWIEG 1552
pAPEC1990     KYVFKAETS LPYRGMDVKLNGFFTLPDGSI VQGD TAEYVPSDTDLNQATVETKYTTWIEG 1548
pNDM-KN       KYVFKAETS LPYRGMDVKLNGFFTLPDGSI VQGD TAEYVPSDTDLNQATVETKYTTWIEG 1548
pUMNK88       KYVFKAETS LPYRGMDVKLNGFFTLPDGSI VQGD TAEYVPSDTDLNQATVETKYTTWIEG 1548
pCf587        KYVFAKETS LPYRGMDVKLNGFFTLPDGSI VEGD TAEYVPSDNDLNQATVETKYTTWIEG 1548
****.***:*****:*****:*****:*****:*****:*****:*****:*****

pKAZ3          YRDQGAESHSLRSRVWQYVWPSFGMQVRKNADVAPATITASVRPIAFNGKLEEPTYEWE 1623
pMS6198A      YRDQGAESHSLRSRVWQYVWPSFGMQVRKNADVAPATITASVRPIAFNGKLEEPTYEWE 1608
pKp55         YRDQGAESHSLRSRVWQYVWPSFGMQVRKNADVAPATITASVRPIAFNGKLEEPTYEWE 1612
pEc19         YRDQGAESHSLRSRVWQYVWPSFGMQVRKNADVAPATITASVRPIAFNGKLEEPTYEWE 1612
pAPEC1990     YRDQGAESHSLRSRVWQYVWPSFGMQVRKNADVAPATITASVRPIAFNGKLEEPTYEWE 1608
pNDM-KN       YRDQGAESHSLRSRVWQYVWPSFGMQVRKNADVAPATITASVRPIAFNGKLEEPTYEWE 1608
pUMNK88       YRDQGAESHSLRSRVWQYVWPSFGMQVRKNADVAPATITASVRPIAFNGKLEEPTYEWE 1608
pCf587        YRDQGAESHSLRSRVWQYVWPSFGFAMQVRKSADAAAPATITASVRPIAFNGKLEEPTYEWE 1608
***:*****:*****.***:*****.***:*****:*****:*****:*****:*****

pKAZ3          LPEGAVIQDQRQDIVRSFVINEPGDYNIKVTVRDARGHETVIEQPLKIGQAAPYAIDLQY 1683
pMS6198A      LPEGAVIQDQRQDIVRSFVINEPGDYNIKVTVRDARGHETVIEQPLKIGQAAPYAIDLQY 1668
pKp55         LPEGAVIQDQRQDIVRSFVINEPGDYNIKVTVRDARGHETVIEQPLKIGQAAPYAIDLQY 1672
pEc19         LPEGAVIQDQRQDIVRSFVINEPGDYNIKVTVRDARGHETVIEQPLKIGQAAPYAIDLQY 1672
pAPEC1990     LPEGAVIQDQRQDIVRSFVINEPGDYNIKVTVRDARGHETVIEQPLKIGQAAPYAIDLQY 1668
pNDM-KN       LPEGAVIQDQRQDIVRSFVINEPGDYNIKVTVRDARGHETVIEQPLKIGQAAPYAIDLQY 1668
pUMNK88       LPEGAVIQDQRQDIVRSFVINEPGDYNIKVTVRDARGHETVIEQPLKIGQAAPYAIDLQY 1668
pCf587        LPEGAVIQDQRQDIVRSFVINEPGDYNIKVTVRDARGHEAVIEKSFKIDQSKPYAIDLQY 1668
*****:*****:*****:*****:*****:*****:*****:*****:*****

pKAZ3          SGSNKYEREPLDVLRLRPYISGGHPRDRISTRVYSVDGTPLESSGYGRATLGAGEHSIKL 1743
pMS6198A      SGSNKYEREPLDVLRLRPYISGGHPRDRISTRVYSVDGTPLESSGYGRATLGAGEHSIKL 1728
pKp55         SGSNKYEREPLDVLRLRPYISGGHPRDRISTRVYSVDGTPLESSGYGRATLGAGEHSIKL 1732
pEc19         SGSNKYEREPLDVLRLRPYISGGHPRDRISTRVYSVDGTPLESSGYGRATLGAGEHSIKL 1732
pAPEC1990     SGSNKYEREPLDVLRLRPYISGGHPRDRISTRVYSVDGTPLESSGYGRATLGAGEHSIKL 1728
pNDM-KN       SGSNKYEREPLDVLRLRPYISGGHPRDRISTRVYSVDGTPLESSGYGRATLGAGEHSIKL 1728
pUMNK88       SGSNKYEREPLDVLRLRPYISGGHPRDRISTRVYSVDGTPLESSGYGRATLGAGEHSIKL 1728
pCf587        SGSNKYEREPLDVLRLRPYISGGHPRDRILTHVYSVDGTPLENSGYGKATLRAGEHSIKL 1728
*****:*****:*****:*****:*****:*****:*****:*****

pKAZ3          KITSEMGHEAEGEVNINVAENKLPACSLSSRET VGSWIVYANCEDTDGRMKS YEWTIAGE 1803
pMS6198A      KITSEMGHEAEGEVNINVAENKLPACSLSSRET VGSWIVYANCEDTDGRMKS YEWTIAGE 1788
pKp55         KITSEMGHEAEGEVNINVAENKLPACSLSSRET VGSWIVYANCEDTDGRMKS YEWTIAGE 1792
pEc19         KITSEMGHEAEGEVNINVAENKLPACSLSSRET VGSWIVYANCEDTDGRMKS YEWTIAGE 1792
pAPEC1990     KITSEMGHEAEGEVNINVAENKLPACSLSSRET VGSWIVYANCEDTDGRMKS YEWTIAGE 1788

```

pNDM-KN KITSEMGHEAEGEVNINVAENKLPACSLSSRETVGSWIVYANCEDTDGRMKS YEWTIAGE 1788  
pUMNK88 KITSEMGHEAEGEVNINVAENKLPACSLSSRETVGSWIVYANCEDTDGRMKS YEWTIAGE 1788  
pCf587 KITSEMGHEAEGEVSINVAENKLPVCSLKSRETVGSWIVYANCEDTDGRMKS YEWTIAGE 1788  
\*\*\*\*\*.\*\*\*\*\*.\*\*\*.\*\*\*\*\*

pKAZ3 LQSISSDRVTISKGT YETMPTISLVGVDDSGGKSEAVTMN 1843  
pMS6198A LQSISSDRVTISKGT YETMPTISLVGVDDSGGKSEAVTMN 1828  
pKp55 LQSISSDRVTISKGT YETMPTISLVGVDDSGGKSEAVTMN 1832  
pEc19 LQSISSDRVTISKGT YETMPTISLVGVDDSGGKSEAVTMN 1832  
pAPEC1990 LQSISSDRVTISKGT YETMPTISLVGVDDSGGKSEAVTMN 1828  
pNDM-KN LQSISSDRVTISKGT YETMPTISLVGVDDSGGKSEAVTMN 1828  
pUMNK88 LQSISSDRVTISKGT YETMPTISLVGVDDSGGKSEAVTMN 1828  
pCf587 LKSISSDRVTISKGP NKT MPTISLVGVDDSGGRSEAVTMN 1828  
\*:\*\*\*\*\* :\*\*\*\*\*:\*\*\*\*\*
