# Supplementary material for: Roles of Proteins Containing Immunoglobulin-Like Domains in the Conjugation of Bacterial Plasmids
Source: PubMed Central journal article supplement (PMC8730810; doi:10.1128/msphere.00978-21), 2022-01-05

# IncA/C

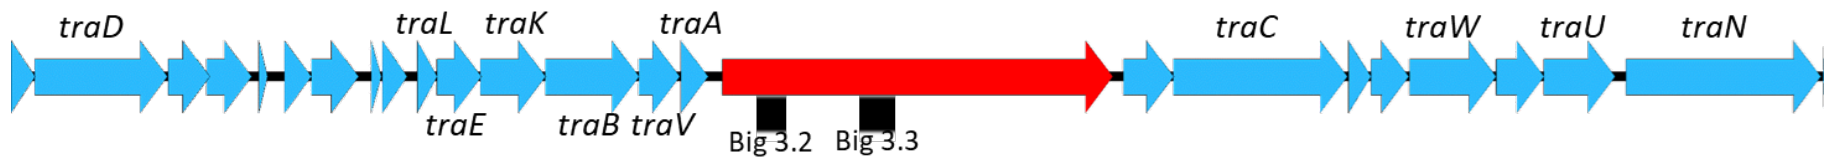

Supplement: msphere.00978-21-sf002.pdf [file msphere.00978-21-sf002.pdf]
