# Supplementary material for: Roles of Proteins Containing Immunoglobulin-Like Domains in the Conjugation of Bacterial Plasmids
Source: PubMed Central journal article supplement (PMC8730810; doi:10.1128/msphere.00978-21), 2022-01-05
Supplement: msphere.00978-21-sf004.pdf [file msphere.00978-21-sf004.pdf]

|            |                                                                |     |
|------------|----------------------------------------------------------------|-----|
| CKA44      | -----MGLT                                                      | 4   |
| HMPREF1223 | MFANLKALAVAGAFFLMSVTTTTSADSWKPIRSGSSSSGWQKVVCDRSGNGWRSCNMGLT   | 60  |
| pOZ176     | -----MGLT                                                      | 4   |
| pJB37      | MFANLKALAVAGAFFLMSVTTTTSADSWKPIRSGSSSSGWQKVVCDRSGNGWRSCNMGLT   | 60  |
| pPWIS1     | -----MGLT                                                      | 4   |
| pAPA25     | -----MGLT                                                      | 4   |
| pNK546KPC  | MFANLKALAVAGAFFLMSVTTTTSADSWKPIRSGSSSSGWQKVVCDRSGNGWRSCNMGLT   | 60  |
| RN02       | -----MGLT                                                      | 4   |
|            | ****                                                           |     |
| CKA44      | IVIQATPGSLAALGEKATLVATVQDYDGNNAAGRGVVINWTTSDGGLSAATTTTDANGQTS  | 64  |
| HMPREF1223 | IVIQATPGSLAALGEKATLVATVQDYDGNNAAGRGVVINWTTSDGGLSAATTTTDANGQTS  | 120 |
| pOZ176     | IVIQATPGSLAALGEKATLVATVQDYDGNNAAGRGVVINWTTSDGGLSAATTTTDANGQTS  | 64  |
| pJB37      | IVIQATPGSLAALGEKATLVATVQDYDGNNAAGRGVVINWTTSDGGLSAATTTTDANGQTS  | 120 |
| pPWIS1     | IVIQATPGSLAALGEKATLVATVQDYDGNNAAGRGVVINWTTSDGGLSAATTTTDANGQTS  | 64  |
| pAPA25     | IVIQATPGSLAALGEKATLVATVQDYDGNNAAGRGVVINWTTSDGGLSAATTTTDANGQTS  | 64  |
| pNK546KPC  | IVIQATPGSLAALGEKATLVATVQDYDGNNAAGRGVVINWTTSDGGLSAATTTTDANGQTS  | 120 |
| RN02       | IVIQATPGSLAALGEKATLVATVQDYDGNNAAGRGVVINWTTSDGGLSAATTTTDANGQTS  | 64  |
|            | *****                                                          |     |
| CKA44      | VVLTSSKTIGGATVSATSPAEGGTGQITVPFTDKWVSTAMYSAWQDSGAPYSCSAWSPD    | 124 |
| HMPREF1223 | VVLTSSKTIGGATVSATSPAEGGTGQITVPFTDKWVSTAMYSAWQDSGAPYSCSAWSPD    | 180 |
| pOZ176     | VVLTSSKTIGGATVSATSPAEGGTGQITVPFTDKWVSTAMYSAWQDSGAPYSCSAWSPD    | 124 |
| pJB37      | VVLTSSKTIGGATVSATSPAEGGTGQITVPFTDKWVSTAMYSAWQDSGAPYSCSAWSPD    | 180 |
| pPWIS1     | VVLTSSKTIGGATVSATSPAEGGTGQITVPFTDKWVSTAMYSAWQDSGAPYSCSAWSPD    | 124 |
| pAPA25     | VVLTSSKTIGGATVSATSPAEGGTGQITVPFTDKWVSTAMYSAWQDSGAPYSCSAWSPD    | 124 |
| pNK546KPC  | VVLTSSKTIGGATVSATSPAEGGTGQITVPFTDKWVSTAMYSAWQDSGAPYSCSAWSPD    | 180 |
| RN02       | VVLTSSKTIGGATVSATSPAEGGTGQITVPFTDKWVSTAMYSAWQDSGAPYSCSAWSPD    | 124 |
|            | *****                                                          |     |
| CKA44      | VSTINQGTSTFTQSAVCYQNQIAYQQNREVS LVTGQVRNVGGVIPLYQTVQAARSQQAVGT | 184 |
| HMPREF1223 | ASTINQGTSTFTQSAVCYQNQIAYQQNREVS LVTGQVRNVGGVIPLYQTVQAARSQQAVGT | 240 |
| pOZ176     | ASTINQGTSTFTQSAVCYQNQIAYQQNREVS LVTGQVRNVGGVIPLYQTVQAARSQQAVGT | 184 |
| pJB37      | ASTINQGTSTFTQSAVCYQNQIAYQQNREVS LVTGQVRNVGGVIPLYQTVQAARSQQAVGT | 240 |
| pPWIS1     | ASTINQGTSTFTQSAVCYQNQIAYQQNREVS LVTGQVRNVGGVIPLYQTVQAARSQQAVGT | 184 |
| pAPA25     | ASTINQGTSTFTQSAVCYQNQIAYQQNREVS LVTGQVRNVGGVIPLYQTVQAARSQQAVGT | 184 |
| pNK546KPC  | ASTINQGTSTFTQSAVCYQNQIAYQQNREVS LVTGQVRNVGGVIPLYQTVQAARSQQAVGT | 240 |
| RN02       | ASTINQGTSTFTQSAVCYQNQIAYQQNREVS LVTGQVRNVGGVIPLYQTVQAARSQQAVGT | 184 |
|            | *****                                                          |     |
| CKA44      | KQSTPSCAWSSFTKNGVYATGWDHGVSN TGGPKQGYRLYLGOYIGE VANATDSFAYNGRI | 244 |
| HMPREF1223 | KQSTPSCAWSSFTKNGVYATGWDHGVSN TGGPKQGYRLYLGOYIGE VANATDSFAYNGRI | 300 |
| pOZ176     | KQSTPSCAWSSFTKNGVYATGWDHGVSN TGGPKQGYRLYLGOYIGE VANATDSFAYNGRI | 244 |
| pJB37      | KQSTPSCAWSSFTKNGVYATGWDHGVSN TGGPKQGYRLYLGOYIGE VANATDSFAYNGRI | 300 |
| pPWIS1     | KQSTPSCAWSSFTKNGVYATGWDHGVSN TGGPKQGYRLYLGOYIGE VANATDSFAYNGRI | 244 |
| pAPA25     | KQSTPSCAWSSFTKNGVYATGWDHGVSN TGGPKQGYRLYLGOYIGE VANATDSFAYNGRI | 244 |
| pNK546KPC  | KQSTPSCAWSSFTKNGVYATGWDHGVSN TGGPKQGYRLYLGOYIGE VANATDSFAYNGRI | 300 |
| RN02       | KQSTPSCAWSSFTKNGVYATGWDHGVSN TGGPKQGYRLYLGOYIGE VANATDSFAYNGRI | 244 |
|            | *****                                                          |     |
| CKA44      | YTIGKFRQSTCLGKNCASSREEYEACSV PQ                                | 274 |
| HMPREF1223 | YTIGKFRQSTCLGKNCASSREEYEACSV PQ                                | 330 |
| pOZ176     | YTIGKFRQSTCLGKNCASSREEYEACSV PQ                                | 274 |
| pJB37      | YTIGKFRQSTCLGKNCASSREEYEACSV PQ                                | 330 |
| pPWIS1     | YTIGKFRQSTCLGKNCASSREEYEACSV PQ                                | 274 |
| pAPA25     | YTIGKFRQSTCLGKNCASSREEYEACSV PQ                                | 274 |
| pNK546KPC  | YTIGKFRQSTCLGKNCASSREEYEACSV PQ                                | 330 |
| RN02       | YTIGKFRQSTCLGKNCASSREEYEACSV PQ                                | 274 |
|            | *****                                                          |     |
